# Supplementary material for: Crizanlizumab for retinal vasculopathy with cerebral leukoencephalopathy in a phase II clinical study
Source: JCI journal article supplement (doi:10.1172/jci180916), 2024-05-07
Supplement: sd1 [file 1]

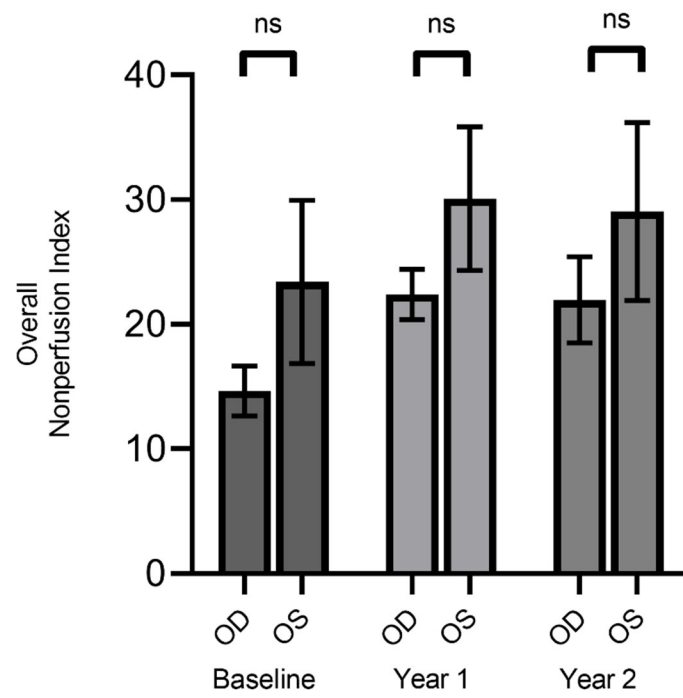

Supplemental Figure 1. Comparison of mean NPI between the right and left eyes of RVCL-S individuals.  
ns: not significant.
